# Supplementary material for: Metabolomic Responses of Guard Cells and Mesophyll Cells to Bicarbonate
Source: PLoS One. 2015 Dec 7;10(12):e0144206. doi: 10.1371/journal.pone.0144206 (PMC4671721; doi:10.1371/journal.pone.0144206)
Supplement: S5 Table — Significantly changed metabolites (P < 0.05) for (A) GC and (B) MC at 5, 15, 30, 60 and 120 mpi bicarbonate treatment with respect to controls as inferred from within subject ANOVA models. (XLSX) [file pone.0144206.s010.xlsx]

## Sheet: Sheet1
S5 Table. Significantly changed metabolites (P < 0.05) for (A) GC and (B) MC at 5, 15, 30, 60 and 120 mpi bicarbonate treatment with respect to controls as inferred from within subject ANOVA models.
[A] GC Metabolites	Treatment	Pathway Enrichment	Time	Pathway Enrichment	Interaction	Pathway Enrichment	[B] MC Metabolites	Treatment	Pathway Enrichment	Time	Pathway Enrichment	Interaction	Pathway Enrichment
(6R)-5,6,7,8-Tetrahydrobiopterin	0.59221	Purine metabolism	1.1149e-07	Pyrimidine metabolism	0.45486	Pyrimidine metabolism	1,3,-Diaminopropane	0.16798	Taurine and hypotaurine metabolism	0.041798	Aminoacyl-tRNA biosynthesis	0.99632	None
1 ACC	0.11559	Pyrimidine metabolism	4.1711e-09	Arginine and proline metabolism	0.45486	Glyoxylate and dicarboxylate metabolism	1-ACC	0.031235	Valine, leucine and isoleucine biosynthesis	0.0059328	Fructose and mannose metabolism	0.99632
1 Methylnicotinamide	0.34414	Flavone and flavonol biosynthesis	0.014959	Glyoxylate and dicarboxylate metabolism	0.88195	Citrate cycle (TCA cycle)	2,3-Dihydroxybenzoic acid	0.012564	Glutathione metabolism	0.073146	Glycine, serine and threonine metabolism	0.99632
1-Kestose	1.2026e-05	Isoquinoline alkaloid biosynthesis	0.92668		0.55072	Riboflavin metabolism	2-Deoxyribose-5-phosphate	0.51448	Aminoacyl-tRNA biosynthesis	0.012493	Amino sugar and nucleotide sugar metabolism	0.99632
1-Methylguanidine	0.71838		0.011434		0.99941		3-Methyladenine	0.0012982	Glycine, serine and threonine metabolism	0.80005		0.99632
1-Methylhistamine	0.69905		5.462e-05		0.93285		4 Hydroxyphenylacetic acid	0.026736	Nitrogen metabolism	0.97287		0.99632
1-Methylhistidine	0.19754		0.023619		0.99941		5-Deoxy-5-methylthio-adenosine	8.3038e-05		0.14237		0.99632
2,4-dihydroxyacetophenone	0.001255		0.6703		0.70926		Abscisic acid glucose ester	0.0025585		0.17346		0.99632
2-aminoethylphosphonic acid	6.8066e-06		0.023619		0.67792		Acetylcholine chloride	0.0014628		0.069822		0.99632
2-Deoxy inosine-5-Triphosphate	0.0017503		0.49856		0.88195		Adenosine	0.012152		0.66086		0.99632
2-Deoxyadenosine	0.062004		5.462e-05		0.891		Alanine	0.19384		0.016104		0.99632
2-Deoxyadenosine-5-Monophosphate	0.0014246		0.00013496		0.36628		Alpha-D-Mannose-1-Phosphate	0.041821		0.019205		0.99632
2-Deoxyguanosine	0.18293		4.8073e-08		0.431		Alpha-lactose	0.0075268		0.27644		0.99632
2-Deoxyguanosine-5-Monphosphate	1.8549e-07		0.45958		0.80189		Arbutin	0.028406		0.92347		0.99632
2-Deoxyribose-5-phosphate	0.00012665		0.012194		0.40092		Arginine	0.9828		0.0027832		0.99632
2-Guanidinopropionic acid	0.10928		0.014791		0.45486		Asparagine	0.88635		0.00018082		0.99632
2-Hydroxy-4-methoxyacetophenone	0.030401		0.1292		0.94544		Benzoic acid	0.001507		0.60356		0.99632
2-Hydroxyiisobutyric acid	1.2137e-08		0.030208		0.38616		Caffeine	0.0075268		0.1473		0.99632
2-Hydroxyphenylacetic acid	5.9335e-10		0.055518		0.36628		Cellobiose	0.027386		0.50477		0.99632
2-Isopropylmalic acid	0.011904		0.17561		0.36628		Citraconic Acid	0.014662		0.8547		0.99632
3,4-Hydroxyphenylpropionic acid	0.0018815		0.42038		0.85849		Cyclic adenosine diphosphate ribose	0.00062819		0.30055		0.99632
3-Methyladenine	0.006965		0.98898		0.95874		Cystathione	0.01651		0.98921		0.99632
3-Methyl-L-histidine	0.69155		4.4065e-07		0.67792		Cysteine	0.0033835		0.63706		0.99632
3-Ureidopropionic acid	0.6453		0.00019316		0.31163		Diethanolamine	0.78676		0.0059328		0.99632
4 Methyl 5 Thiazol ethanol	0.58059		0.026416		0.88886		D-Mannitol	8.3038e-05		0.079222		0.99632
4-HBA	0.070761		0.026416		0.38616		D-mannose-6-phosphate	0.25364		0.015714		0.99632
4-Hydroxy-3-methoxycinnamaldehyde	1.7808e-09		0.46245		0.42582		Dodecanoic acid	0.0033835		0.022453		0.99632
4-Nitrophenol	5.615e-07		0.4281		0.82849		D-Ribose-5-phosphate	0.031961		0.94822		0.99632
5,6-Dihydrouracil	0.047458		0.025672		0.28997		Epibrassinolide	0.0073442		0.00095863		0.99632
5-Deoxy-5-methylthio-adenosine	0.68374		0.00010933		0.99941		Ethylmalonic acid	0.030293		0.44368		0.99632
6-Furfurylaminopurine	0.00014491		0.85665		0.80332		Fumaric acid	0.028604		0.42288		0.99632
6-Hydroxy flavone	0.030341		0.85665		0.95133		Glutamic Acid	0.0007039		0.20057		0.99632
7-Hydroxyflavone	0.00056309		0.68729		0.93285		Glutamine	0.0073442		0.052489		0.99632
8-Nitro cGMP	0.021626		0.079963		0.88195		Glutaric acid	0.014662		0.018914		0.99632
Acetylsalicylic acid	0.045052		0.045219		0.20609		Glutathione	0.0011985		0.25807		0.99632
Adenosine	1.4854e-06		0.02681		0.2104		Glycine	0.0012584		0.17861		0.99632
Adenosine-3-monophosphate	9.7591e-08		0.45958		0.80332		GSH	0.001551		0.58385		0.99632
Alanine	0.045724		0.29198		0.34035		guanidine	0.041821		0.81115		0.99632
Alpha-D-Mannose-1-phosphate	9.1792e-11		0.0011543		0.017926		Guanine	0.19402		0.00088474		0.99632
Alpha-lactose	6.8066e-06		0.11324		0.86693		Histidine	0.12301		0.032605		0.99632
Alpha-Lipoamide	0.085102		0.0056675		0.80332		Homo-L-methionine	0.0025585		0.7401		0.99632
Apigenin	8.2335e-05		0.21166		0.431		Hypotaurine	0.0098137		0.80005		0.99632
Apigenin-7-glucoside	0.09681		0.026867		0.95979		Indole butyric acid	0.014662		0.36542		0.99632
Arabitol	0.022286		0.15191		0.80332		Inosine	0.0075268		0.48511		0.99632
Arginine	0.59221		3.9391e-08		0.80332		L-Cysteine-S-Sulfate	0.012564		0.70084		0.99632
Betaine	0.00070616		0.033865		0.28509		Leucine	0.023182		0.26517		0.99632
Biochanin A 4-methylgeistein	2.0379e-10		0.6773		0.80332		Lysine	0.0051449		0.052489		0.99632
Boric Acid	0.029156		0.082321		0.92773		Methylthiobutyric acid	0.0073442		0.10732		0.99632
Caffeic acid	0.0011687		0.45958		0.95979		N,N-Dimethylglycine	0.092276		0.0094613		0.99632
Caffeine	0.030401		0.58796		0.45486		N-Alpha-L-ornithine	0.55945		0.00095863		0.99632
Callistephin Chloride	0.35657		5.1824e-06		0.431		Neohesperidin	0.028604		0.97876		0.99632
Capsaicin	2.6803e-05		0.023676		0.88195		N-formyl-L-methionine	0.00051418		0.054079		0.99632
Catechin	1.956e-11		0.23337		0.5351		O-phosphoserine	0.0033835		0.0059328		0.99632
Cellobiose	0.010305		0.029712		0.088958		Pyridoxine di	0.65266		0.041798		0.99632
cis-4-Hydroxyl-L-Proline	0.096183		0.0064182		0.78338		pyroglutamic acid	0.0033835		0.92026		0.99632
cis-Aconitic acid	0.23782		1.2903e-09		0.037592		Riboflavin-5-monophosphate	0.011453		0.81115		0.99632
Coumaric acid	6.386e-06		0.48852		0.85261		Sarcosine	0.24107		0.0094613		0.99632
Cyclic adenosine diphosphate ribose	2.5824e-06		0.00013496		0.03575		Sphingosine-1-phosphate	0.042277		0.58385		0.99632
Cystathione	0.6453		0.0080737		0.84011		Taurine	0.026973		0.32223		0.99632
Cysteine	0.99422		6.2372e-05		0.93285		Threonine	0.046561		0.018914		0.99632
Cytosine	0.00069383		0.78352		0.80332		TriMethylamine N-oxide	0.023891		0.26517		0.99632
Dehydroascorbic acid	0.19466		4.3579e-06		0.90673		Uridine-5-monophosphate	0.026736		0.57409		0.99632
D-Glucosamine-6-Phosphate	0.25316		5.462e-05		0.63295		Vanillin	0.031141		0.81812		0.99632
D-Glucose-6-phosphate	0.00087068		4.882e-05		0.058972		Xanthophyll	0.0071942		0.92347		0.99632
Diethanolamine	0.02222		0.026416		0.45486
Dihydrophaseic acid	1.956e-11		0.044986		0.99941
D-Mannitol	0.87951		0.040694		0.99941
D-mannose-6-phosphate	1.0049e-08		4.7888e-05		0.011562
Dodecanoic acid	1.0399e-08		0.47766		0.42823
D-Ribose-5-phosphate	1.6522e-09		0.28439		0.592
Epibrassinolide	0.002302		0.62299		0.63105
Epicatechin	5.544e-11		0.21905		0.45486
Eriodictyol	0.21292		0.070247		0.033189
Ethylene glycol	0.0017721		0.012576		0.021705
Folic acid	0.79271		7.4611e-06		0.99941
Galactinol	9.7591e-08		0.98628		0.80332
Galacturonic acid	0.0019421		0.0019535		0.28997
Gamma-Glu-Cys	0.15888		8.753e-05		0.65727
Gibberellin A3	2.2525e-05		0.10249		0.20749
Glutamic Acid	0.12957		7.1337e-11		0.033189
Glutamine	0.02697		0.20443		0.45486
Glutaric acid	0.32263		0.00020637		0.80332
GSH	0.0022454		0.43465		0.891
Glycerol	0.084998		0.04687		0.85849
Glycolic acid	2.8653e-05		0.0024977		0.50655
guanidine	0.0059162		0.0052985		0.45927
Guanosine	0.59885		1.7061e-05		0.99941
Gulonic acid gamma lactone	0.65748		0.023619		0.78338
Hesperetin	0.00070616		0.3128		0.98479
Hexadecanoic acid	0.00056309		0.44933		0.93285
Histamine	0.72879		2.4271e-05		0.81954
Homogentisic acid	0.0010863		0.059994		0.92773
HomoMethionine	0.02379		0.93556		0.66926
Hydroxylamine	0.82498		0.04687		0.82849
Hypoxanthine1	0.0012018		0.46566		0.70041
Inosine	5.241e-07		0.0095511		0.38616
Inosine-5-diphosphate	0.00034765		0.74155		0.93285
Isoleucine	0.57345		0.00019316		0.85849
Isoliquiritigenin	0.00048075		0.42038		0.95089
Isomaltose	4.4928e-05		0.76529		0.92869
Jasmonic acid	0.012748		8.753e-05		0.011256
Kinetin	0.004138		0.08222		0.45486
L Dihydroorotic acid	4.0908e-06		0.10847		0.88195
L Glutathione	0.0002151		0.41167		0.99941
L-Carnosine	1.9078e-06		0.14299		0.91299
L-Citrulline	0.7039		1.6433e-09		0.077086
L-Cysteine-S-Sulfate	0.031371		0.44933		0.31648
Lignoceryl alcohol	0.00016782		0.2156		0.14863
L-Malic Acid	2.0677e-05		4.3579e-06		0.017926
L-Methionine sulfone	0.04283		0.088032		0.84011
L-Ornithine	0.42812		1.621e-07		0.4007
Luteolin	9.1792e-11		0.16687		0.28676
Luteolin-7-beta-glucoside	0.41196		0.00068428		0.70926
Malonic acid	9.8905e-06		0.00055002		0.013317
Maltitol	0.59885		0.016092		0.82924
Maltose	0.00047255		0.33235		0.78338
Mandelic acid	0.00018961		0.76529		0.55072
Melatonin	0.0017721		0.016092		0.73124
Melibiose	0.00053617		0.044986		0.78338
N,N-Dimethylglycine	0.78888		0.0022816		0.99941
N-Alpha-L Ornithine	0.0030461		0.034422		0.85849
Naringin1	0.019364		0.20443		0.431
N-formyl-L-methionine	0.00093754		0.64503		0.59923
Niacin	0.0219		0.16341		0.98479
Niacinamide	4.1507e-07		0.16875		0.431
Nicotinamide	0.69155		0.0074869		0.82924
Nicotinic acid	0.00067363		0.036611		0.88297
Octadecanoic acid	0.0011487		0.55438		0.86693
Octadecanoic acid methyl ester	0.032997		0.098695		0.94773
o-hydroxycinnamic acid	6.3317e-05		0.55438		0.84011
Ononin	6.7625e-06		0.46566		0.39359
O-phosphoserine	4.1579e-12		0.0022816		0.004384
Orotic Acid	0.0022471		0.1196		0.55072
O-Succinyl L-Homoserine	0.12672		0.026416		0.93285
Pelargonin Chloride	0.66549		0.025398		0.87684
Phenylalanine	0.45304		1.1149e-07		0.85849
Pimelic acid	0.0028549		0.099262		0.4699
Pyridoxine	1.2482e-06		0.6773		0.93285
Pyrocatechol	0.01188		0.99879		0.99941
pyroglutamic acid	0.0019421		0.38121		0.55072
Raffinose	2.4651e-05		0.15856		0.88195
Retinol	1.956e-11		0.17184		0.36628
Riboflavin	0.0044758		7.1337e-11		6.1465e-05
Riboflavin-5-Monphosphate	0.012214		0.64513		0.93285
Rosmarinic acid	0.00092275		0.077974		0.70937
Rutin	3.0629e-05		0.64513		0.89179
Salicin	0.0031221		0.90185		0.93285
Shikimic acid	0.00053617		0.2114		0.59993
Sphingosine	0.76623		0.0013951		0.20749
Sphingosine-1-phosphate	9.8891e-05		0.0022816		0.4843
Suberyl glycine	0.28087		0.047776		0.95643
Syringic acid	4.576e-05		0.81915		0.81459
Thiamine	0.035407		0.88012		0.84011
Threitol	0.18491		0.044986		0.93285
Threonine	0.10841		0.011526		0.59923
Thymidine	0.015819		0.098743		0.85849
Thymine	0.42079		6.5496e-05		0.83852
TriMethylamine N-oxide	0.019365		0.64513		0.99941
trans-4-Hydroxy-L-proline	0.078605		0.00033597		0.54237
Tryptamine	0.71231		0.033865		0.88195
Tyramine	0.03087		0.060216		0.93285
Tyrosine	0.027153		0.38206		0.88195
Uracil	0.027059		1.2869e-07		0.0017806
Uric Acid	0.0052881		0.053667		0.98479
Uridine	0.031371		7.1337e-11		0.0074106
Uridine-5-monophosphate	0.1884		0.015075		0.92869
Xanthine	0.0013746		0.14836		0.68598
Xylose	0.25316		0.0039003		0.55072
Zeatin riboside	0.0028848		0.85702		0.84923
